# Supplementary material for: Species richness, distribution and genetic diversity of Caenorhabditis nematodes in a remote tropical rainforest
Source: PubMed Central journal article supplement (PMC3556333; doi:10.1186/1471-2148-13-10), 2013-01-12

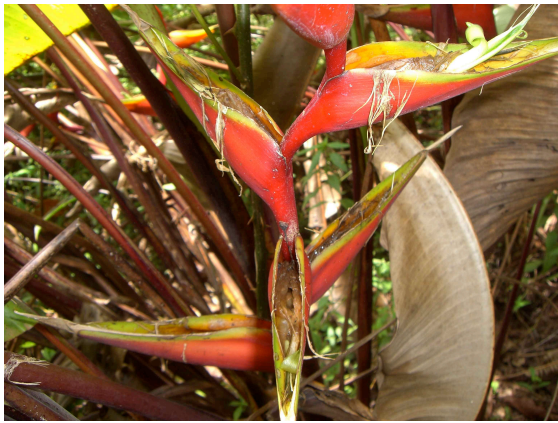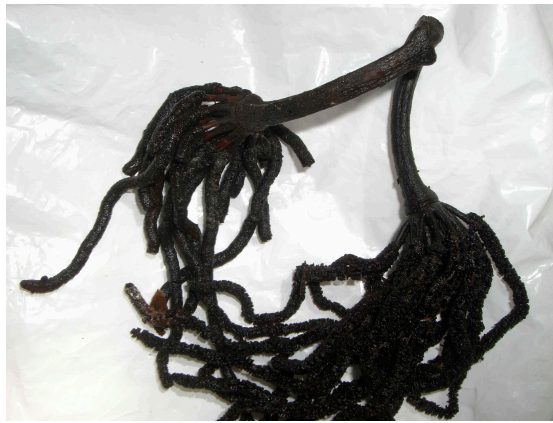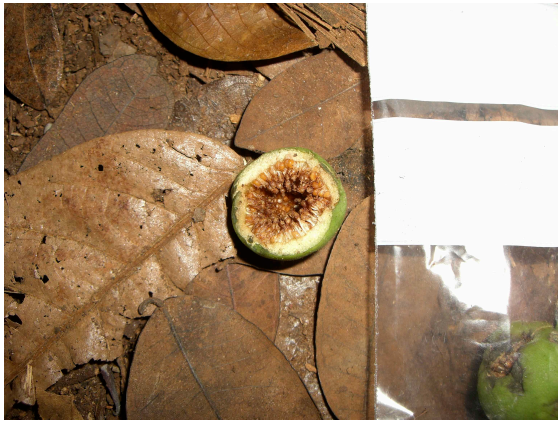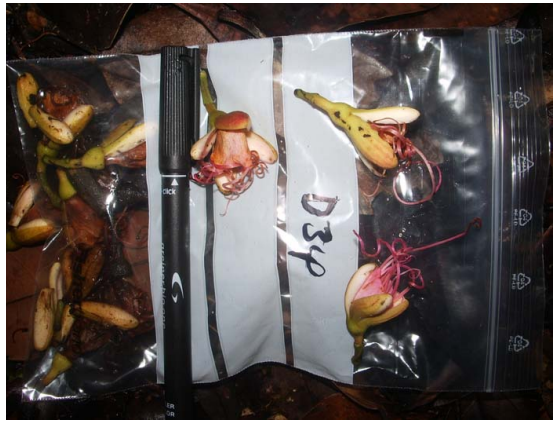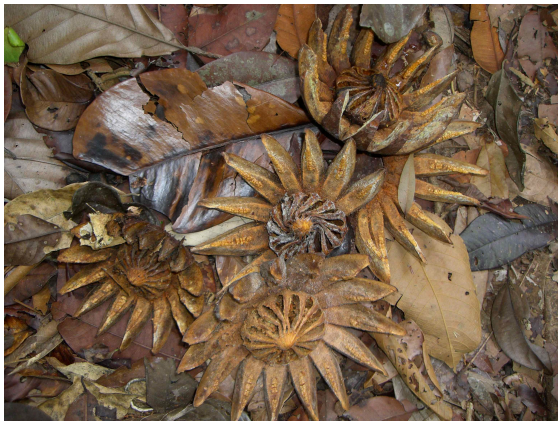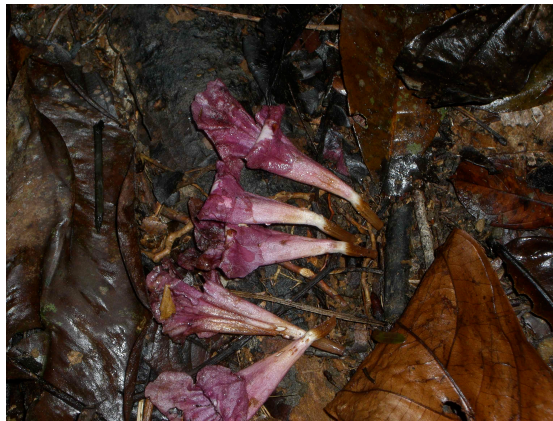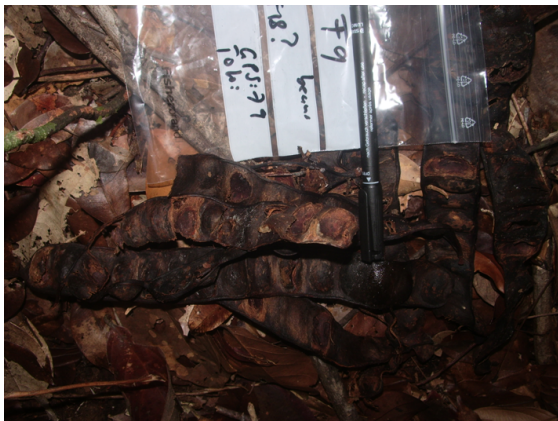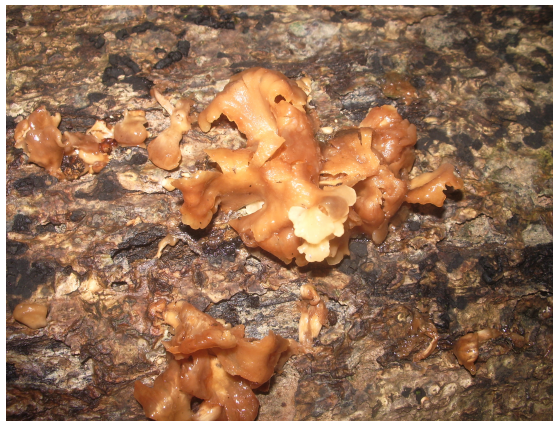

Supplement: 1471-2148-13-10-S1.pdf [file 1471-2148-13-10-S1.pdf]
